# Supplementary material for: Recovery of heather (Calluna vulgaris) flowering in northern Finland
Source: publisher site journal article supplement (doi:10.1515/opag-2020-0212), 2021-01-01
Supplement: Supplementary file 1 [file opag-2020-0212_sm.pdf]

Supplementary meterial

**Table S1:** Results of the linear mixed models analyzing the effects of harvesting (clipping and machine harvesting) on the shoot and flowering parameters of *Calluna vulgaris* (L.) Hull during 2011–2012 in Petäjävaara. Year: Ndf = 1, harvesting Ndf = 2, year x harvesting Ndf = 2. Ddf = 21

|             |                                               | Year     |                  | Harvesting |                  | Interaction |                  |
|-------------|-----------------------------------------------|----------|------------------|------------|------------------|-------------|------------------|
|             |                                               | <i>F</i> | <i>p</i>         | <i>F</i>   | <i>p</i>         | <i>F</i>    | <i>p</i>         |
| Mean number |                                               |          |                  |            |                  |             |                  |
| 15          | All shoots (SS + FLS + NFLS)                  | 15.820   | <b>0.001</b>     | 0.151      | 0.861            | 3.240       | 0.059            |
|             | Short shoots (SS)                             | 3.344    | 0.082            | 0.085      | 0.918            | 4.181       | <b>0.030</b>     |
|             | Flowering long shoots (FLS) <sup>a</sup>      | 7.750    | <b>0.011</b>     | 5.211      | <b>0.015</b>     | 4.263       | <b>0.028</b>     |
|             | Non-flowering long shoots (NFLS) <sup>a</sup> | 126.951  | <b>&lt;0.001</b> | 0.915      | 0.416            | 9.081       | <b>0.001</b>     |
| Relative    |                                               |          |                  |            |                  |             |                  |
| 20          | Short shoots (SS)                             | 22.949   | <b>&lt;0.001</b> | 1.029      | 0.375            | 3.385       | 0.053            |
|             | Flowering long shoots (FLS) <sup>a</sup>      | 22.660   | <b>&lt;0.001</b> | 3.166      | 0.063            | 1.960       | 0.166            |
|             | Non-flowering long shoots (NFLS) <sup>a</sup> | 62.391   | <b>&lt;0.001</b> | 2.169      | 0.139            | 11.045      | <b>0.001</b>     |
|             | Length of FLS (mm)                            | 3.941    | 0.060            | 5.380      | <b>0.013</b>     | 19.996      | <b>&lt;0.001</b> |
| 25          | Number of flowers/FLS <sup>a</sup>            | 36.552   | <b>&lt;0.001</b> | 12.492     | <b>&lt;0.001</b> | 18.914      | <b>&lt;0.001</b> |

<sup>a</sup>Log-transformed data were used in the analysis.

**Table S2:** Results of the linear mixed models analyzing the effects of harvesting (manual clipping) on the shoot and flowering parameters of *Calluna vulgaris* (L.) Hull during 2010–2012 in Meltaus. Year: Ndf = 2, harvesting method Ndf = 1, year x harvesting method Ndf = 2. Ddf = 14

|                                               | Year     |                  | Harvesting |                  | Interaction |                  |
|-----------------------------------------------|----------|------------------|------------|------------------|-------------|------------------|
|                                               | <i>F</i> | <i>p</i>         | <i>F</i>   | <i>p</i>         | <i>F</i>    | <i>p</i>         |
| <b>Mean number</b>                            |          |                  |            |                  |             |                  |
| All shoots (SS + FLS + NFLS)                  | 0.527    | 0.601            | 5.817      | <b>0.030</b>     | 0.612       | 0.556            |
| Short shoots (SS)                             | 0.100    | 0.905            | 3.370      | 0.088            | 0.123       | 0.886            |
| Flowering long shoots (FLS) <sup>a</sup>      | 16.354   | <b>&lt;0.001</b> | 120.785    | <b>&lt;0.001</b> | 9.820       | <b>0.002</b>     |
| Non-flowering long shoots (NFLS) <sup>a</sup> | 30.868   | <b>&lt;0.001</b> | 10.425     | <b>0.006</b>     | 7.279       | <b>0.007</b>     |
| <b>Relative</b>                               |          |                  |            |                  |             |                  |
| Short shoots (SS) <sup>a</sup>                | 9.452    | <b>0.003</b>     | 63.950     | <b>&lt;0.001</b> | 5.983       | <b>0.013</b>     |
| Flowering long shoots (FLS) <sup>a</sup>      | 16.179   | <b>&lt;0.001</b> | 108.169    | <b>&lt;0.001</b> | 12.316      | <b>0.001</b>     |
| Non-flowering long shoots (NFLS) <sup>a</sup> | 28.572   | <b>&lt;0.001</b> | 3.419      | 0.086            | 7.433       | <b>0.006</b>     |
| Length of FLS                                 | 8.921    | <b>0.003</b>     | 32.987     | <b>&lt;0.001</b> | 0.738       | 0.496            |
| Number of flowers/FLS                         | 38.781   | <b>&lt;0.001</b> | 101.833    | <b>&lt;0.001</b> | 21.390      | <b>&lt;0.001</b> |

Square root-transformed data were used in the analysis.

<sup>a</sup>Log-transformed data were used in the analysis.

**Table S3:** Results of the linear mixed models analyzing the effects of harvesting (stripping and machine harvesting) on the growth and flowering parameters of *Calluna vulgaris* (L.) Hull during 2010–2012 in Sodankylä. Year: Ndf = 2, harvesting Ndf = 2, year x harvesting Ndf = 4. Ddf = 21

|                                               | Year     |                  | Harvesting |              | Interaction |              |
|-----------------------------------------------|----------|------------------|------------|--------------|-------------|--------------|
|                                               | <i>F</i> | <i>p</i>         | <i>F</i>   | <i>p</i>     | <i>F</i>    | <i>p</i>     |
| <b>Mean number</b>                            |          |                  |            |              |             |              |
| All shoots (SS + FLS + NFLS)                  | 1.546    | 0.236            | 2.055      | 0.153        | 0.925       | 0.468        |
| Short shoots (SS)                             | 1.223    | 0.314            | 1.677      | 0.211        | 0.792       | 0.544        |
| Flowering long shoots (FLS) <sup>a</sup>      | 40.732   | <b>&lt;0.001</b> | 4.781      | <b>0.019</b> | 0.819       | 0.522        |
| Non-flowering long shoots (NFLS)              | 44.720   | <b>&lt;0.001</b> | 3.507      | <b>0.048</b> | 1.781       | 0.170        |
| <b>Relative</b>                               |          |                  |            |              |             |              |
| Short shoots (SS)                             | 45.212   | <b>&lt;0.001</b> | 1.904      | 0.174        | 0.116       | 0.976        |
| Flowering long shoots (FLS)                   | 207.528  | <b>&lt;0.001</b> | 7.368      | <b>0.004</b> | 6.650       | <b>0.001</b> |
| Non-flowering long shoots (NFLS) <sup>a</sup> | 93.547   | <b>&lt;0.001</b> | 0.288      | 0.753        | 0.478       | 0.751        |
| Length of FLS                                 | 35.605   | <b>&lt;0.001</b> | 3.809      | <b>0.039</b> | 6.650       | <b>0.001</b> |
| Number of flowers/FLS                         | 207.720  | <b>&lt;0.001</b> | 7.442      | <b>0.004</b> | 3.711       | <b>0.020</b> |

<sup>a</sup>Log-transformed data were used in the analysis.
